# Supplementary material for: Chemotherapy-induced oral mucositis is associated with detrimental bacterial dysbiosis
Source: PubMed Central journal article supplement (PMC6482518; doi:10.1186/s40168-019-0679-5), 2019-04-25
Supplement: 40168_2019_679_MOESM2_ESM.pdf [file 40168_2019_679_MOESM2_ESM.pdf]

Table S1. Demographic and baseline clinical characteristics of study participants.

| Variable                                                                  | Non-cancer<br>n=30    | Cancer n=49                    |                                  |                      | Statistic<br>(Non-cancer vs<br>All<br>cancer) |
|---------------------------------------------------------------------------|-----------------------|--------------------------------|----------------------------------|----------------------|-----------------------------------------------|
|                                                                           |                       | Chemotherapy<br>-naïve<br>n=32 | Chemotherapy<br>-exposed<br>n=17 | All Cancer<br>n=49   |                                               |
| <b>Age</b>                                                                | <b>47.5±14.1</b>      | 58.7±13.9                      | 56.6±10.3                        | <b>58.1±13.1</b>     | <b>0.002*</b>                                 |
| <b>Gender (% male)</b>                                                    | <b>30.0</b>           | <b>68.8<sup>‡</sup></b>        | <b>29.4<sup>‡</sup></b>          | <b>55.1</b>          | <b>0.030<sup>#</sup></b>                      |
| Race (% white)                                                            | 100.0                 | 90.6                           | 88.2                             | 89.8                 | 0.132 <sup>@</sup>                            |
| Ethnicity (% hispanic)                                                    | 6.7                   | 6.3                            | 5.9                              | 6.1                  | 1.000 <sup>@</sup>                            |
| Smoking history (% yes)                                                   | 47.8 <sup>&amp;</sup> | 68.8                           | 52.9                             | 63.2                 | 0.226 <sup>#</sup>                            |
| Former smoker (% yes)                                                     | 39.1 <sup>&amp;</sup> | 53.1                           | 41.2                             | 48.8                 | 0.457 <sup>#</sup>                            |
| Current smoker (% yes)                                                    | 8.7 <sup>&amp;</sup>  | 15.6                           | 11.8                             | 14.3                 | 0.700 <sup>@</sup>                            |
| Acid inhibitor use (% yes)                                                | 6.7                   | 18.8                           | 41.2                             | 26.5                 | 0.103 <sup>@</sup>                            |
| Inhaler steroid use (% yes)                                               | 0.0                   | 6.3                            | 5.9                              | 6.1                  | 0.288 <sup>@</sup>                            |
| <b>Number of teeth</b>                                                    | <b>28(0-32)</b>       | 25(0-32)                       | 28(0-32)                         | <b>26(0-32)</b>      | <b>0.001<sup>^</sup></b>                      |
| Prosthetic teeth (% yes)                                                  | 66.7                  | 78.1                           | 82.4                             | 79.6                 | 0.285 <sup>#</sup>                            |
| Number of teeth replaced by prosthesis                                    | 1(0-28)               | 2(0-32)                        | 2(0-32)                          | 2(0-32)              | 0.233 <sup>^</sup>                            |
| Removable prosthesis (% yes)                                              | 6.7                   | 15.6                           | 11.8                             | 14.3                 | 0.453 <sup>@</sup>                            |
| Visible caries lesions (% yes)                                            | 23.3                  | 37.5                           | 17.6                             | 30.6                 | 0.438 <sup>@</sup>                            |
| Number of teeth with visible caries lesions                               | 0(0-2)                | 0(0-11)                        | 0(0-4)                           | 0(0-11)              | 0.267 <sup>^</sup>                            |
| <b>Plaque index</b>                                                       | <b>0.6(0.1-1.3)</b>   | 1.1(0.0-2.5)                   | 1.1(0.6-1.8)                     | <b>1.1(0.0-2.5)</b>  | <b>0.001<sup>^</sup></b>                      |
| Periodontal status (CPITN, %)                                             |                       |                                |                                  |                      | 0.303 <sup>@</sup>                            |
| • Healthy                                                                 | 16.7                  | 6.3                            | 0.0                              | 4.1                  |                                               |
| • Bleeding                                                                | 0.0                   | 3.1                            | 0.0                              | 2.0                  |                                               |
| • Calculus                                                                | 30.0                  | 31.3                           | 47.1                             | 36.7                 |                                               |
| • Periodontal pocket between 4 and 5.5 mm                                 | 46.7                  | 37.5                           | 41.2                             | 38.8                 |                                               |
| • Periodontal pocket > 5.5 mm                                             | 3.3                   | 15.6                           | 5.9                              | 12.2                 |                                               |
| • Edentulous                                                              | 3.3                   | 6.3                            | 5.9                              | 6.1                  |                                               |
| Salivary flow rate (mL/min)                                               | 0.4(0.1-1.2)          | 0.4(0.1-1.5)                   | 0.3(0.1-0.9)                     | 0.4(0.1-1.5)         | 0.705 <sup>^</sup>                            |
| <b>Subjective oral dryness (1 to 10 scale)</b>                            | <b>2(0-6)</b>         | 5(0-8)                         | 4(0-9)                           | <b>4(0-9)</b>        | <b>0.009<sup>^</sup></b>                      |
| <b>Peripheral absolute neutrophil count (x 1000/mm<sup>3</sup> blood)</b> | <b>3.1(1.5-5.4)</b>   | 5.9(2.2-18.4)                  | 7.3(2.5-13.9)                    | <b>6.1(2.2-18.4)</b> | <b>&lt;0.001<sup>^f</sup></b>                 |
| Oral neutrophil count (x 10,000/rinse)                                    | 62(5-203)             | 46(6-229)                      | 38(6-473)                        | 43(6-473)            | 0.283 <sup>^</sup>                            |

The distribution of continuous data was tested for normality using measures of Skewness and Kurtosis and the Shapiro-Wilk test in SPSS. For normally-distributed continuous variables mean ± standard deviation is shown. For non-normally distributed continuous variables median is shown with range in parenthesis. Statistical tests for continuous data were applied according to data distribution. For non-continuous variables data shown represent percentage of subjects positive. <sup>&</sup>Smoking data in the non-cancer group are based on 23 subjects as 7 subjects did not provide this information. <sup>\*</sup>Independent sample t-test; <sup>#</sup>chi-square; <sup>@</sup>Fisher's exact test; <sup>^</sup>Mann-Whitney U test. <sup>‡</sup>Chemotherapy-naïve and chemotherapy-exposed subjects did not significantly differ in any parameter, except for gender. <sup>f</sup>Blood neutrophil counts were higher at baseline in cancer subjects since some individuals received steroids, known to induce neutrophilia, days prior to commencing chemotherapy.

Table S2. Descriptive statistics specific to the cancer cohort.

|                                              | Variable                               | All subjects with cancer | Chemotherapy-naïve | Chemotherapy-exposed |
|----------------------------------------------|----------------------------------------|--------------------------|--------------------|----------------------|
| Diagnosis                                    | Squamous-cell carcinoma                | 42.9%                    | 56.3%              | 17.6%                |
|                                              | Breast cancer                          | 28.6%                    | 18.8%              | 47.1%                |
|                                              | Adenocarcinoma                         | 22.4%                    | 18.8%              | 29.4%                |
|                                              | Other cancer                           | 6.1%                     | 6.3%               | 5.9%                 |
| Chemotherapeutic drugs received during cycle | 5-FU                                   | 69.4%                    | 81.3%              | 47.1%                |
|                                              | Doxorubicin                            | 30.6%                    | 18.8%              | 52.9%                |
|                                              | Docetaxel                              | 42.9%                    | 56.3%              | 17.6%                |
|                                              | Cyclophosphamide                       | 28.6%                    | 18.8%              | 47.1%                |
|                                              | Cisplatin                              | 34.7%                    | 43.8%              | 17.6%                |
|                                              | Carboplatin                            | 14.3%                    | 18.8%              | 5.9%                 |
|                                              | Oxaliplatin                            | 14.3%                    | 12.5%              | 17.6%                |
|                                              | Leucovorin                             | 16.3%                    | 12.5%              | 23.5%                |
|                                              | Herceptin                              | 4.1%                     | 3.1%               | 5.9%                 |
|                                              | Mitomycin                              | 4.1%                     | 3.1%               | 5.9%                 |
|                                              | Bevacizumab                            | 4.1%                     | 0%                 | 11.8%                |
|                                              | Irinotecan                             | 2%                       | 0%                 | 5.9%                 |
|                                              | Vinblastine                            | 2%                       | 0%                 | 5.9%                 |
| Chemotherapy regimen (drug combinations)     | 5FU-docetaxel-cisplatin                | 30.6%                    | 40.6%              | 11.8%                |
|                                              | 5FU-docetaxel-carboplatin              | 12.2%                    | 15.6%              | 5.9%                 |
|                                              | 5FU-oxaliplatin-leucovorin             | 8.2%                     | 9.4%               | 5.9%                 |
|                                              | 5FU                                    | 4.1%                     | 6.3%               | 0.0%                 |
|                                              | 5FU-mitomycin                          | 4.1%                     | 3.1%               | 5.9%                 |
|                                              | 5FU-oxaliplatin-leucovorin-herceptin   | 4.1%                     | 3.1%               | 5.9%                 |
|                                              | 5FU-cisplatin-carboplatin              | 2.0%                     | 3.1%               | 0.0%                 |
|                                              | 5-FU-irinotecan-Bevacizumab-leucovorin | 2.0%                     | 0.0%               | 5.9%                 |
|                                              | 5FU-oxaliplatin-leucovorin-Bevacizumab | 2.0%                     | 0.0%               | 5.9%                 |
|                                              | Doxorubicin-cyclophosphamide           | 28.6%                    | 18.8%              | 47.1%                |
|                                              | Doxorubicin-cisplatin-vinblastine      | 2.0%                     | 0.0%               | 5.9%                 |
| Antibiotic use                               | Any antibiotic                         | 40.8%                    | 53.1%              | 17.6%                |
|                                              | Single dose prophylactic               | 22.4%                    | 34.4%              | 0%                   |
|                                              | Multi-dose                             | 20.4%                    | 21.9%              | 17.6%                |
| Steroid                                      | Steroid pre-chemotherapy               | 18.4%                    | 18.8%              | 17.6%                |
|                                              | Steroid during cycle                   | 75.5%                    | 81.3%              | 64.7%                |
| Other                                        | Pegfilgrastim                          | 73.5%                    | 75.0%              | 70.6%                |
|                                              | Acid inhibitors                        | 69.4%                    | 81.3%              | 47.1%                |

Table S3. Correlations between change in oral mucositis severity (OMAS) or change in salivary bacterial diversity with demographic and clinical characteristics.

|                                     | Change vs zero (p value) | Oral mucositis (OMAS) (Q) | Oral mucositis (OMAS) (L) | Salivary bacterial diversity (Q) | Salivary bacterial diversity (L) |
|-------------------------------------|--------------------------|---------------------------|---------------------------|----------------------------------|----------------------------------|
| Oral mucositis (Q)                  | <0.001                   | -                         | -0.350(0.016)             | -0.070(0.659)                    | 0.076(0.621)                     |
| Oral mucositis (L)                  | <0.001                   | -0.350(0.016)             | -                         | 0.013(0.935)                     | -0.192(0.201)                    |
| Salivary bacterial diversity (Q)    | 0.051                    | -0.070(0.659)             | 0.013(0.935)              | -                                | -0.071(0.653)                    |
| Salivary bacterial diversity (L)    | 0.009                    | 0.076(0.621)              | -0.192(0.201)             | 0.071(0.653)                     | -                                |
| Salivary flow rate (Q)              | 0.742                    | 0.028(0.850)              | 0.040(0.789)              | 0.066(0.680)                     | 0.115(0.452)                     |
| Salivary flow rate (L)              | 0.002                    | -0.481(0.001)             | 0.419(0.003)              | -0.045(0.776)                    | -0.005(0.974)                    |
| Plaque Index (Q)                    | 0.767                    | 0.230(0.129)              | -0.180(0.237)             | 0.047(0.772)                     | 0.053(0.734)                     |
| Plaque Index (L)                    | 0.940                    | -0.226(0.135)             | 0.318(0.033)              | 0.125(0.442)                     | -0.037(0.815)                    |
| Oral neutrophil count (Q)           | 0.398                    | 0.023(0.878)              | -0.057(0.702)             | -0.152(0.388)                    | 0.249(0.099)                     |
| Oral neutrophil count (L)           | 0.623                    | -0.140(0.350)             | 0.385(0.007)              | -0.084(0.597)                    | 0.123(0.422)                     |
| Peripheral neutrophil count (Q)     | <0.001                   | -0.207(0.168)             | 0.463(0.001)              | 0.254(0.108)                     | -0.064(0.679)                    |
| Peripheral neutrophil count (L)     | 0.360                    | 0.034(0.822)              | 0.332(0.023)              | -0.013(0.934)                    | -0.173(0.254)                    |
| Age                                 | -                        | -0.151(0.312)             | 0.053(0.716)              | 0.039(0.805)                     | 0.084(0.581)                     |
| Gender (female)                     | -                        | 0.256(0.082)              | -0.267(0.063)             | -0.174(0.271)                    | 0.165(0.272)                     |
| Ethnicity (white)                   | -                        | 0.145(0.332)              | -0.163(0.264)             | -0.116(0.463)                    | -0.023(0.879)                    |
| Number of natural teeth             | -                        | 0.245(0.097)              | -0.054(0.714)             | -0.224(0.153)                    | -0.124(0.410)                    |
| Number of prosthetic teeth          | -                        | -0.427(0.003)             | 0.038(0.795)              | 0.005(0.977)                     | 0.224(0.135)                     |
| Removable prosthesis                | -                        | -0.437(0.002)             | 0.118(0.418)              | 0.120(0.450)                     | 0.215(0.151)                     |
| Number of teeth with caries lesions | -                        | 0.032(0.830)              | 0.265(0.066)              | 0.287(0.066)                     | -0.174(0.248)                    |
| Presence of severe periodontitis    | -                        | -0.249(0.099)             | -0.064(0.672)             | -0.180(0.267)                    | 0.220(0.156)                     |
| Smoking history                     | -                        | 0.090(0.547)              | 0.349(0.014)              | -0.077(0.627)                    | -0.033(0.830)                    |
| Number of years smoked              | -                        | -0.046(0.762)             | 0.385(0.007)              | 0.050(0.757)                     | 0.004(0.980)                     |
| Current smoker                      | -                        | 0.149(0.319)              | 0.349(0.014)              | 0.217(0.167)                     | -0.129(0.394)                    |
| Antibiotics (any)                   | -                        | -0.072(0.632)             | 0.043(0.771)              | -0.180(0.255)                    | -0.217(0.147)                    |
| Multi-dose antibiotic               | -                        | 0.017(0.910)              | 0.112(0.444)              | -0.111(0.482)                    | -0.446(0.002)                    |
| Single-dose antibiotic              | -                        | -0.141(0.343)             | -0.134(0.359)             | -0.169(0.285)                    | 0.102(0.502)                     |
| Steroids                            | -                        | 0.214(0.149)              | 0.423(0.002)              | 0.081(0.611)                     | -0.100(0.509)                    |
| Acid inhibitors                     | -                        | -0.182(0.220)             | 0.247(0.086)              | 0.340(0.028)                     | -0.299(0.044)                    |
| Doxorubicin-based regimen           | -                        | 0.271(0.066)              | -0.244(0.091)             | -0.143(0.365)                    | 0.206(0.170)                     |
| 5-FU dose                           | -                        | -0.413(0.004)             | 0.341(0.016)              | 0.225(0.153)                     | -0.486(0.006)                    |
| Doxorubicin dose                    | -                        | -0.226(0.437)             | -0.886(<0.001)            | 0.152(0.619)                     | 0.064(0.822)                     |
| Docetaxel dose                      | -                        | -0.380(0.008)             | 0.307(0.032)              | 0.447(0.003)                     | -0.266(0.074)                    |
| Cyclophosphamide dose               | -                        | 0.263(0.074)              | -0.342(0.016)             | -0.172(0.277)                    | 0.192(0.204)                     |
| Cisplatin dose                      | -                        | -0.173(0.245)             | 0.425(0.002)              | 0.424(0.005)                     | -0.330(0.025)                    |
| Carboplatin dose                    | -                        | -0.330(0.023)             | 0.270(0.061)              | -0.108(0.494)                    | -0.218(0.146)                    |
| Oxaliplatin dose                    | -                        | 0.169(0.257)              | -0.325(0.023)             | 0.068(0.667)                     | 0.082(0.587)                     |
| Leucovorin                          | -                        | 0.186(0.210)              | -0.298(0.038)             | -0.028(0.861)                    | 0.174(0.247)                     |

As described in Methods, clinical variables measured at more than 1 time point (top 12 rows) were evaluated using linear (L) or quadratic (Q) orthogonal polynomial contrasts. For quadratic change, a positive means a “U” shaped curve (i.e., high to low to high); negative means “inverted U” shape (i.e., low to high to low). For linear change a positive was defined as an upward change while negative was a downward change from baseline. Correlations between longitudinal change and other variables were evaluated via Spearman Rank Correlation tests. Data shown are correlation coefficients with p values in parenthesis. Significance thresholds for each outcome variable (per column) were adjusted for multiple comparisons via the FDR method. Values in red indicate correlations significant after FDR adjustment. Values in yellow indicate correlations with a p value <0.05 but not significant after FDR adjustment.

Table S5. Sequencing summary

|               |                         | Number of samples | Number of Reads after Pre-processing (median with range) |
|---------------|-------------------------|-------------------|----------------------------------------------------------|
| Cancer        | 16S saliva              | 173               | 6,144 (3,074-13,733)                                     |
|               | 16S mucosa healthy      | 166               | 6,038 (3,077-27,550)                                     |
|               | 16S mucosa erythematous | 13                | 5,972 (3,594-17,098)                                     |
|               | 16S mucosa ulcerated    | 40                | 6,077 (3,111-10,575)                                     |
|               | Fungal ITS saliva       | 148               | 7,993 (1,338-48,056)                                     |
| Total Cancer  |                         | 540               |                                                          |
| Control       | 16S saliva              | 58                | 6,516 (4,031-13,919)                                     |
|               | 16S mucosa healthy      | 47                | 6,781 (3,335-12,453)                                     |
|               | Fungal ITS saliva       | 46                | 8,198 (2,045-35,928)                                     |
| Total Control |                         | 151               |                                                          |
| Total         |                         | 691               |                                                          |

Table S6. Within subject differences in alpha-diversity (non-parametric Shannon index) between mucosal sites with different clinical appearance.

| Groups tested                        | P value (paired Wilcoxon Rank test) |
|--------------------------------------|-------------------------------------|
| Healthy mucosa vs erythematous at V2 | 0.180                               |
| Healthy mucosa vs erythematous at V3 | 0.465                               |
| Healthy mucosa vs erythematous at V4 | 0.053                               |
| Healthy mucosa vs ulcerated at V2    | 0.465                               |
| Healthy mucosa vs ulcerated at V3    | 0.149                               |
| Healthy mucosa vs ulcerated at V4    | 0.799                               |

Table S7. Main clinical characteristics of subjects included in the mucosal gene expression analyses.

| Gender | Race  | Age | Diagnosis                            | Regimen           | Cycle | Docetaxel | Cyclophosphamide | Cisplatin | Carboplatin | Oxaliplatin | Leucovorin | Cytosin | Current smoker | OMAS at V3 |
|--------|-------|-----|--------------------------------------|-------------------|-------|-----------|------------------|-----------|-------------|-------------|------------|---------|----------------|------------|
| Male   | White | 77  | Squamous cell carcinoma              | 5-FU-based        | 1st   | yes       | no               | no        | yes         | no          | no         | no      | no             | 2          |
| Male   | White | 56  | Squamous cell carcinoma              | 5-FU-based        | 2nd   | yes       | no               | yes       | no          | no          | no         | no      | yes            | 11         |
| Male   | White | 50  | Squamous cell carcinoma              | 5-FU-based        | 1st   | yes       | no               | yes       | no          | no          | no         | no      | yes            | 0          |
| Male   | Black | 67  | Invasive adenocarcinoma              | 5-FU-based        | 1st   | yes       | no               | yes       | no          | no          | no         | no      | no             | 2          |
| Male   | Black | 80  | Carcinoma of the rectum              | 5-FU-based        | 1st   | no        | no               | no        | no          | no          | no         | no      | no             | 3          |
| Female | White | 35  | Invasive ductal breast carcinoma     | Doxorubicin-based | 1st   | no        | no               | no        | no          | no          | no         | yes     | no             | 5          |
| Male   | White | 63  | Squamous cell carcinoma              | 5-FU-based        | 1st   | yes       | no               | yes       | no          | no          | no         | no      | no             | 12         |
| Female | White | 65  | Infiltrating ductal breast carcinoma | Doxorubicin-based | 1st   | no        | yes              | no        | no          | no          | no         | no      | no             | 0          |
| Male   | White | 62  | Squamous cell carcinoma              | 5-FU-based        | 1st   | yes       | no               | yes       | no          | no          | no         | no      | no             | 10         |
| Male   | White | 82  | Adenocarcinoma                       | 5-FU-based        | 1st   | no        | no               | no        | no          | no          | no         | no      | no             | 2          |
| Male   | White | 50  | Squamous cell carcinoma              | 5-FU-based        | 2nd   | yes       | no               | yes       | no          | no          | no         | no      | yes            | 5          |
| Female | White | 42  | Adenocarcinoma                       | 5-FU-based        | 3rd   | no        | no               | no        | no          | yes         | yes        | no      | no             | 0          |
| Female | White | 45  | Invasive ductal breast carcinoma     | Doxorubicin-based | 2nd   | no        | yes              | no        | no          | no          | no         | no      | yes            | 4          |
| Female | White | 46  | Infiltrating ductal breast carcinoma | Doxorubicin-based | 2nd   | no        | yes              | no        | no          | no          | no         | no      | no             | 5          |
