# Supplementary material for: Chemotherapy-induced oral mucositis is associated with detrimental bacterial dysbiosis
Source: Microbiome. 2019 Apr 25;7:66. doi: 10.1186/s40168-019-0679-5 (PMC6482518; doi:10.1186/s40168-019-0679-5)
Supplement: Supplementary file 4 — Table S8. SAM analysis of differential gene expression between baseline and V3 in 14 subjects, showing 158 upregulated and 2 downregulated genes at V3 (> 1.5-fold). (XLSX 24 kb) [file 40168_2019_679_MOESM4_ESM.xlsx]

## Sheet: downregulated (filtered 1.5)
Row	Gene ID	Score(d)	Numerator(r)	Denominator(s+s0)	Fold Change	q-value(%)
18661	PACS1	-3.49796	-526.612	150.548	0.621668	4.58296
1320	APOBEC3B	-3.68739	-179.062	48.5608	0.63656	4.08663

## Sheet: upregulated (filtered 1.5)
Row	Gene ID	Score(d)	Numerator(r)	Denominator(s+s0)	Fold Change	q-value(%)
14358	LOC728454	3.09668	2455.23	792.86	5.86794	3.81758
3324	C1ORF68	2.83488	588.671	207.653	4.95263	4.2734
12106	IL17C	2.92092	422.42	144.619	4.41209	4.8013
13247	KLK5	3.45052	988.613	286.511	4.07132	3.84658
7756	EDN1	3.48935	1284.21	368.036	3.88833	3.84658
6446	CXCL2	3.13863	802.331	255.631	3.74464	4.20045
27354	UBXN11	3.03625	429.217	141.364	3.69349	4.0403
9089	FCGBP	2.83308	479.043	169.089	3.50332	4.2734
13253	KLK7	2.99599	1443.97	481.968	3.45804	4.0403
13249	KLK5	3.12883	829.583	265.142	3.44535	4.20045
19796	PLGLB1	3.42408	557.819	162.911	3.3599	3.62012
12670	KCNC2	3.691	477.8	129.45	3.3319	3.84658
4617	CCL20	3.07443	752.17	244.654	3.24386	4.81758
24892	STARD13	3.17597	333.178	104.906	3.14943	4.20045
13964	LOC124220	3.96502	790.567	199.385	3.07947	2.60966
21795	RIPK5	3.20985	222.871	69.4336	3.04813	3.02134
13078	KIF27	2.95164	391.683	132.7	2.93596	3.08663
1156	ANKRD6	3.72269	834.478	224.16	2.93055	2.84658
689	AGPAT4	4.76062	630.599	132.461	2.67227	0.727433
13504	LAMB3	4.06098	540.453	133.084	2.61765	1.73894
1735	ASNS	3.47053	607.669	175.094	2.60824	2.84658
3811	C6ORF15	3.51961	321.333	91.2979	2.57487	2.84658
28037	WFDC12	3.34162	1096.35	328.09	2.5493	3.88795
26705	TRIM39	3.14677	231.38	73.5293	2.54282	4.20045
19013	PCID2	2.8833	328.54	113.946	2.51794	4.8013
5064	CDSN	2.90986	244.774	84.1188	2.4922	4.8013
24353	SOCS1	2.79429	258.812	92.6215	2.46072	4.58296
712	AGXT2L1	3.06552	162.208	52.9139	2.4295	4.81758
2402	BMP2	2.8305	209.435	73.9923	2.40387	4.2734
6896	DEFB103A	4.78267	1299.26	271.659	2.39934	1.72743
13908	LOC100129550	3.27442	622.691	190.168	2.39084	3.02134
19848	PMAIP1	3.12373	337.128	107.925	2.36505	4.20045
1000	AMPD3	3.30043	320.404	97.0796	2.33636	3.88795
28046	WFDC5	3.58197	585.22	163.379	2.31067	2.84658
1155	ANKRD6	3.46565	1160.04	334.726	2.26191	2.84658
21680	RGS2	4.10728	549.01	133.667	2.24851	1.73894
1888	ATP2C1	3.14393	207.712	66.0676	2.23965	4.20045
23229	SIRT1	5.6193	439.362	78.188	2.23271	0.727433
7577	DUOXA1	2.87778	1642.69	570.818	2.23223	1.8013
16837	MYOM1	3.67912	237.93	64.6704	2.22595	1.84658
28038	WFDC12	3.35183	726.353	216.704	2.22087	3.88795
7822	EFNB2	3.34716	338.548	101.145	2.20843	3.88795
28921	ZNF554	2.82357	433.625	153.574	2.13875	4.2734
7586	DUSP10	3.66291	331.605	90.5306	2.13313	2.84658
24400	SORD	3.17416	404.31	127.375	2.13056	4.20045
28678	ZNF263	2.94509	426.497	144.816	2.12353	4.08663
12015	IGF2BP2	3.58366	1725.49	481.487	2.11296	2.84658
22908	SERPINB7	3.17692	298.289	93.8925	2.10923	4.20045
20187	PPP1R10	2.83287	716.647	252.976	2.10323	4.2734
8992	FBXO11	3.51152	228.798	65.1564	2.09232	2.84658
10156	GEMIN8	2.88485	117.577	40.7569	2.07948	4.8013
23121	SHANK3	3.63477	542.657	149.296	2.0619	2.84658
18502	OSBPL3	3.52597	161.665	45.8497	2.05284	2.84658
5449	CLCA2	2.85386	478.461	167.654	2.04773	4.2734
11784	HSPBAP1	2.87391	172.709	60.0957	2.03586	4.8013
25105	SUPV3L1	3.51065	123.169	35.0845	1.99321	4.84658
18610	P2RY1	3.17633	235.851	74.2525	1.98419	4.20045
24891	STARD13	3.14503	136.728	43.4741	1.97643	4.20045
26289	TMPRSS11F	3.40115	763.503	224.483	1.95633	3.62012
341	ACRC	3.75296	178.308	47.5112	1.94679	2.84658
28047	WFDC5	3.36091	1455.31	433.012	1.94594	3.62012
7280	DNAJA3	2.95129	129.669	43.9364	1.94166	4.08663
14800	MACC1	5.22277	402.683	77.1015	1.92549	1.72743
3471	C21ORF34	3.07871	439.095	142.623	1.90414	4.81758
26330	TNF	2.92156	94.1415	32.223	1.90091	4.8013
13983	LOC151162	2.98881	747.737	250.178	1.89778	4.08663
6564	CYP26B1	2.84408	187.731	66.0078	1.88818	4.2734
28344	ZC3H12C	3.08438	110.198	35.7279	1.87811	4.81758
26706	TRIM39	4.35344	668.416	153.537	1.87166	1.73894
25514	TCEAL8	4.97721	309.023	62.0877	1.86787	0.727433
14198	LOC440354	2.916	294.474	100.985	1.86785	4.8013
23122	SHANK3	2.89475	919.05	317.489	1.8653	4.8013
26066	TMEM14C	5.3095	650.458	122.508	1.86426	0.727433
4029	C9ORF61	2.95418	147.128	49.8035	1.86176	4.08663
13440	KRTAP9-3	3.18047	80.4887	25.3072	1.85673	4.20045
14166	LOC401252	2.80557	805.305	287.038	1.84956	4.58296
28199	XPOT	3.11372	631.065	202.673	1.8478	4.81758
12979	KIAA1370	3.00026	255.26	85.0792	1.84683	4.0403
8485	FAHD1	3.59862	298.001	82.8096	1.84428	2.84658
22420	S100A3	3.15732	184.88	58.556	1.84373	4.20045
9406	FLJ35776	3.00261	813.275	270.856	1.82866	3.0403
22248	RPUSD4	4.70363	221.576	47.1074	1.81918	0.727433
6055	CREB3L2	3.19291	282.954	88.6194	1.81832	4.20045
8647	FAM162A	2.81256	172.494	61.3299	1.81787	4.58296
4939	CDC6	2.83293	78.8706	27.8406	1.81427	4.2734
24967	STK4	3.10094	345.916	111.552	1.8138	4.81758
28030	WEE1	3.17043	213.665	67.3929	1.80917	4.20045
5966	CPEB2	4.20896	807.496	191.852	1.79385	1.73894
944	ALOXE3	2.85084	122.545	42.9854	1.79227	4.2734
17951	ODC1	2.95301	351.873	119.158	1.79198	4.08663
17932	OBFC2B	3.29057	130.578	39.6827	1.7852	3.88795
23896	SMCR7	3.20003	304.141	95.0432	1.78052	4.02134
26707	TRIM39	4.95714	201.093	40.5663	1.77797	0.727433
10443	GNL3	4.22904	1099.6	260.012	1.76783	1.73894
9370	FLJ22639	2.97893	124.694	41.8586	1.76374	4.08663
26173	TMEM231	3.48697	96.671	27.7235	1.75624	2.84658
7368	DNHL1	3.35962	324.163	96.4879	1.74331	3.62012
23903	SMG1	2.9159	172.375	59.1154	1.73317	4.8013
7888	EIF2AK4	2.7847	435.157	156.267	1.72913	4.58296
8871	FAM89A	2.83641	128.526	45.3128	1.72461	4.2734
13959	LOC100216545	3.07379	143.367	46.6417	1.71464	4.81758
29178	ZNF841	3.55351	1293.46	363.996	1.71266	2.84658
29154	ZNF808	3.18101	143.458	45.0981	1.70874	4.20045
7084	DHX40	2.83248	337.062	118.999	1.7087	4.2734
10739	GRAMD3	3.2835	228.192	69.4965	1.70341	3.88795
5564	CLK1	3.56782	119.84	33.5892	1.6985	2.84658
27434	UHRF1	3.3144	96.2495	29.0398	1.69146	3.88795
19991	POLR3B	3.06212	466.909	152.479	1.68608	4.81758
7587	DUSP10	3.76927	131.552	34.9012	1.68368	1.60966
10155	GEMIN8	2.80194	67.9027	24.2342	1.67683	4.58296
6852	DDX42	3.27336	134.306	41.0301	1.67039	4.02134
25515	TCEAL8	4.33691	666.888	153.771	1.6686	1.73894
13674	LENG9	4.07634	104.766	25.7009	1.66847	1.73894
8567	FAM124B	3.89216	96.2964	24.7411	1.66416	1.60966
23628	SLC39A2	3.04364	82.0384	26.954	1.65986	4.0403
21853	RNF103	2.93269	395.633	134.905	1.659	4.08663
24265	SNRNP40	3.24302	224.098	69.1017	1.65767	4.02134
1890	ATP2C1	3.21604	1788.27	556.046	1.65235	4.02134
17747	NT5C3	2.82333	1226.23	434.319	1.65113	4.2734
26901	TSPAN10	2.9811	392.876	131.789	1.64567	4.08663
713	AGXT2L1	3.11195	68.9554	22.1583	1.63836	4.81758
2215	BCAR3	3.14585	442.499	140.661	1.62514	4.20045
8974	FBXL2	2.81496	74.4284	26.4404	1.61671	4.2734
14543	LRRC14	2.89659	100.26	34.6132	1.61228	4.8013
17729	NSUN2	2.96116	136.045	45.9429	1.60958	4.08663
4716	CCRN4L	3.22629	102.852	31.8794	1.60957	4.02134
473	ADAMTS1	3.2484	67.9416	20.9154	1.605	4.02134
16388	MRPL21	3.98176	526.307	132.179	1.60377	1.60966
17592	NPR2	3.7096	93.0779	25.0911	1.598	2.84658
26784	TRMT2B	3.42162	153.799	44.9493	1.59498	3.62012
22715	SDHAP3	3.275	87.4949	26.716	1.59142	4.02134
3485	C21ORF57	3.07586	171.768	55.844	1.58979	4.81758
3797	C6ORF124	3.59093	186.731	52.0007	1.58956	2.84658
26258	TMEM91	2.86953	105.031	36.6023	1.58605	4.8013
4514	CCDC34	2.81617	78.466	27.8626	1.58172	4.2734
19527	PIK3C2A	3.78831	91.1651	24.0649	1.58084	1.60966
8870	FAM89A	3.15015	72.836	23.1214	1.57993	4.20045
20251	PPP2R3A	2.99651	180.334	60.1814	1.57347	4.0403
10451	GNPDA1	3.51847	394.178	112.031	1.56475	2.84658
23636	SLC39A6	4.40407	76.7462	17.4262	1.5629	1.73894
24667	SPRYD4	4.18143	606.976	145.16	1.56124	1.73894
27088	TTYH3	2.91059	62.0087	21.3045	1.55742	4.8013
13733	LGTN	2.87369	209.354	72.8519	1.55586	4.8013
12339	INTS6	3.93744	69.7502	17.7146	1.55333	1.60966
13529	LARGE	3.72486	91.2117	24.4873	1.55183	2.84658
6682	DARS2	3.16162	72.6903	22.9915	1.55093	4.20045
7686	E2F4	3.42901	108.405	31.6141	1.55028	2.84658
16387	MRPL21	3.69903	160.332	43.3443	1.54477	2.84658
21790	RIPK1	3.8876	331.284	85.2156	1.5419	1.60966
20939	PVR	3.41246	176.461	51.7106	1.53716	3.62012
3081	C17ORF81	2.98857	67.5909	22.6165	1.53115	4.08663
1493	ARHGEF4	2.79068	146.267	52.4127	1.52806	4.58296
15159	MBNL1	3.25719	257.376	79.0177	1.52391	4.02134
4690	CCPG1	3.2237	103.637	32.1484	1.51856	4.02134
727	AHR	2.90585	147.464	50.7473	1.51844	4.8013
11551	HNRPH1	3.22976	88.9831	27.551	1.51769	4.02134
28355	ZC3H4	2.99788	217.514	72.5558	1.51616	4.0403
7897	EIF2C2	2.9284	574.467	196.171	1.51044	4.08663
