# Supplementary material for: Chemotherapy-induced oral mucositis is associated with detrimental bacterial dysbiosis
Source: Microbiome. 2019 Apr 25;7:66. doi: 10.1186/s40168-019-0679-5 (PMC6482518; doi:10.1186/s40168-019-0679-5)
Supplement: Supplementary file 5 — Table S9. Summary of upregulated gene ontology (GO) term categories. (XLSX 13 kb) [file 40168_2019_679_MOESM5_ESM.xlsx]

## Sheet: DAVID_Functional_annotation_Got
Category	Term	Count	%	PValue	Genes
GOTERM_BP_FAT	GO:0045444~fat cell differentiation	9	7.56303	3.03219e-05	BMP2, LAMB3, TNF, ALOXE3, RGS2, SOCS1, DUSP10, STK4, SIRT1
GOTERM_BP_FAT	GO:0009607~response to biotic stimulus	17	14.2857	8.75939e-05	PVR, PACS1, KLK7, ODC1, TNF, DEFB103A, KLK5, CXCL2, EDN1, TMEM91, DUSP10, PMAIP1, POLR3B, APOBEC3B, WFDC12, CCL20, EIF2AK4
GOTERM_BP_FAT	GO:0002922~positive regulation of humoral immune response	4	3.36134	0.00012143	KLK7, TNF, DEFB103A, KLK5
GOTERM_BP_FAT	GO:0006952~defense response	23	19.3277	0.000124304	PVR, PACS1, KLK7, BMP2, TNF, DUOXA1, DEFB103A, KLK5, SOCS1, CXCL2, EDN1, DUSP10, PMAIP1, POLR3B, SHANK3, IL17C, APOBEC3B, WFDC12, CCL20, RIPK1, CYP26B1, DNAJA3, EIF2AK4
GOTERM_BP_FAT	GO:0031347~regulation of defense response	14	11.7647	0.000269013	PVR, PACS1, KLK7, TNF, DUOXA1, DEFB103A, RIPK1, KLK5, SOCS1, DUSP10, POLR3B, DNAJA3, SHANK3, EIF2AK4
GOTERM_BP_FAT	GO:0002225~positive regulation of antimicrobial peptide production	3	2.52101	0.000374418	KLK7, DEFB103A, KLK5
GOTERM_BP_FAT	GO:0002803~positive regulation of antibacterial peptide production	3	2.52101	0.000374418	KLK7, DEFB103A, KLK5
GOTERM_BP_FAT	GO:0052548~regulation of endopeptidase activity	10	8.40336	0.000498177	WFDC12, TNF, PCID2, RIPK1, SERPINB7, FAM162A, PMAIP1, SIRT1, WFDC5, DNAJA3
GOTERM_BP_FAT	GO:0008544~epidermis development	9	7.56303	0.000547135	C1ORF68, KLK7, LAMB3, TNF, ATP2C1, CYP26B1, KLK5, STK4, CDSN
GOTERM_BP_FAT	GO:0002760~positive regulation of antimicrobial humoral response	3	2.52101	0.000559359	KLK7, DEFB103A, KLK5
GOTERM_BP_FAT	GO:0002786~regulation of antibacterial peptide production	3	2.52101	0.000559359	KLK7, DEFB103A, KLK5
GOTERM_BP_FAT	GO:0002784~regulation of antimicrobial peptide production	3	2.52101	0.000559359	KLK7, DEFB103A, KLK5
GOTERM_BP_FAT	GO:0043207~response to external biotic stimulus	15	12.605	0.000574323	PACS1, KLK7, ODC1, TNF, DEFB103A, CXCL2, EDN1, KLK5, DUSP10, PMAIP1, POLR3B, APOBEC3B, WFDC12, CCL20, EIF2AK4
GOTERM_BP_FAT	GO:0051707~response to other organism	15	12.605	0.000574323	PACS1, KLK7, ODC1, TNF, DEFB103A, CXCL2, EDN1, KLK5, DUSP10, PMAIP1, POLR3B, APOBEC3B, WFDC12, CCL20, EIF2AK4
GOTERM_BP_FAT	GO:0052547~regulation of peptidase activity	10	8.40336	0.000778695	WFDC12, TNF, PCID2, RIPK1, SERPINB7, FAM162A, PMAIP1, SIRT1, WFDC5, DNAJA3
GOTERM_BP_FAT	GO:0002778~antibacterial peptide production	3	2.52101	0.000779942	KLK7, DEFB103A, KLK5
GOTERM_BP_FAT	GO:0002775~antimicrobial peptide production	3	2.52101	0.000779942	KLK7, DEFB103A, KLK5
GOTERM_BP_FAT	GO:0080134~regulation of response to stress	19	15.9664	0.000845236	PVR, PACS1, KLK7, BMP2, TNF, DUOXA1, DEFB103A, KLK5, EDN1, SOCS1, DUSP10, PMAIP1, ANKRD6, SIRT1, POLR3B, SHANK3, RIPK1, DNAJA3, EIF2AK4
GOTERM_BP_FAT	GO:0043280~positive regulation of cysteine-type endopeptidase activity involved in apoptotic process	6	5.04202	0.000858988	TNF, RIPK1, FAM162A, PMAIP1, SIRT1, DNAJA3
GOTERM_BP_FAT	GO:0098542~defense response to other organism	11	9.2437	0.000966224	PACS1, APOBEC3B, KLK7, WFDC12, TNF, CCL20, DEFB103A, KLK5, PMAIP1, POLR3B, EIF2AK4
GOTERM_BP_FAT	GO:0002759~regulation of antimicrobial humoral response	3	2.52101	0.00103573	KLK7, DEFB103A, KLK5
GOTERM_BP_FAT	GO:1900426~positive regulation of defense response to bacterium	3	2.52101	0.00103573	KLK7, DEFB103A, KLK5
GOTERM_BP_FAT	GO:0051246~regulation of protein metabolic process	29	24.3697	0.00107216	TNF, PPP2R3A, CPEB2, EDN1, DUSP10, IGF2BP2, PMAIP1, ANKRD6, CCL20, P2RY1, FAM162A, DNAJA3, GNL3, ODC1, CDC6, BMP2, PCID2, SOCS1, SIRT1, STK4, WFDC12, UHRF1, RGS2, RIPK1, SERPINB7, WFDC5, EIF2AK4, TRIM39, BCAR3
GOTERM_BP_FAT	GO:2001056~positive regulation of cysteine-type endopeptidase activity	6	5.04202	0.00119106	TNF, RIPK1, FAM162A, PMAIP1, SIRT1, DNAJA3
GOTERM_BP_FAT	GO:0048584~positive regulation of response to stimulus	25	21.0084	0.00120307	PVR, KLK7, BMP2, PPP2R3A, TNF, DEFB103A, CXCL2, EDN1, SOCS1, KLK5, PMAIP1, ANKRD6, SIRT1, POLR3B, STK4, SHANK3, TSPAN10, CCL20, ATP2C1, RIPK1, P2RY1, FAM162A, TRIM39, EIF2AK4, BCAR3
GOTERM_BP_FAT	GO:0051336~regulation of hydrolase activity	19	15.9664	0.00133076	ARHGEF4, BMP2, TNF, CCPG1, CPEB2, PCID2, PMAIP1, SIRT1, STARD13, WFDC12, UHRF1, CCL20, RGS2, RIPK1, SERPINB7, FAM162A, WFDC5, DNAJA3, BCAR3
GOTERM_BP_FAT	GO:0002831~regulation of response to biotic stimulus	6	5.04202	0.00155866	PVR, PACS1, KLK7, DEFB103A, KLK5, EIF2AK4
GOTERM_BP_FAT	GO:0002833~positive regulation of response to biotic stimulus	4	3.36134	0.00178737	PVR, KLK7, DEFB103A, KLK5
GOTERM_BP_FAT	GO:0010950~positive regulation of endopeptidase activity	6	5.04202	0.00182715	TNF, RIPK1, FAM162A, PMAIP1, SIRT1, DNAJA3
GOTERM_BP_FAT	GO:0032268~regulation of cellular protein metabolic process	27	22.6891	0.00185192	TNF, CPEB2, EDN1, DUSP10, IGF2BP2, PMAIP1, ANKRD6, CCL20, P2RY1, FAM162A, DNAJA3, GNL3, CDC6, BMP2, PCID2, SOCS1, STK4, SIRT1, WFDC12, UHRF1, RGS2, RIPK1, SERPINB7, WFDC5, EIF2AK4, TRIM39, BCAR3
GOTERM_BP_FAT	GO:0002682~regulation of immune system process	19	15.9664	0.00186601	PVR, PACS1, KLK7, TNF, PCID2, DEFB103A, KLK5, CXCL2, EFNB2, SOCS1, DUSP10, POLR3B, SIRT1, AHR, CCL20, RIPK1, CYP26B1, DNAJA3, EIF2AK4
GOTERM_BP_FAT	GO:0006919~activation of cysteine-type endopeptidase activity involved in apoptotic process	5	4.20168	0.00207468	TNF, RIPK1, FAM162A, PMAIP1, DNAJA3
GOTERM_BP_FAT	GO:1900424~regulation of defense response to bacterium	3	2.52101	0.00240223	KLK7, DEFB103A, KLK5
GOTERM_BP_FAT	GO:2000116~regulation of cysteine-type endopeptidase activity	7	5.88235	0.0026816	TNF, PCID2, RIPK1, FAM162A, PMAIP1, SIRT1, DNAJA3
GOTERM_BP_FAT	GO:0009967~positive regulation of signal transduction	19	15.9664	0.00275665	BMP2, TNF, PPP2R3A, KLK5, EDN1, SOCS1, PMAIP1, ANKRD6, STK4, SIRT1, SHANK3, TSPAN10, CCL20, ATP2C1, RIPK1, P2RY1, FAM162A, TRIM39, BCAR3
GOTERM_BP_FAT	GO:0010952~positive regulation of peptidase activity	6	5.04202	0.00275873	TNF, RIPK1, FAM162A, PMAIP1, SIRT1, DNAJA3
GOTERM_BP_FAT	GO:0010647~positive regulation of cell communication	20	16.8067	0.0029519	BMP2, TNF, PPP2R3A, KLK5, SOCS1, EDN1, PMAIP1, ANKRD6, STK4, SIRT1, SHANK3, TSPAN10, CCL20, ATP2C1, RIPK1, P2RY1, FAM162A, EIF2AK4, TRIM39, BCAR3
GOTERM_BP_FAT	GO:0023056~positive regulation of signaling	20	16.8067	0.0031258	BMP2, TNF, PPP2R3A, KLK5, SOCS1, EDN1, PMAIP1, ANKRD6, STK4, SIRT1, SHANK3, TSPAN10, CCL20, ATP2C1, RIPK1, P2RY1, FAM162A, EIF2AK4, TRIM39, BCAR3
GOTERM_BP_FAT	GO:0032269~negative regulation of cellular protein metabolic process	15	12.605	0.00313433	TNF, CPEB2, PCID2, EDN1, SOCS1, DUSP10, IGF2BP2, SIRT1, WFDC12, RGS2, SERPINB7, WFDC5, EIF2AK4, TRIM39, DNAJA3
GOTERM_BP_FAT	GO:0006508~proteolysis	21	17.6471	0.00334699	KLK7, UBXN11, CLCA2, TNF, PCID2, KLK5, PMAIP1, SIRT1, WFDC12, UHRF1, RNF103, RIPK1, SERPINB7, TMPRSS11F, ADAMTS1, FAM162A, WFDC5, DNAJA3, TRIM39, FBXO11, FBXL2
GOTERM_BP_FAT	GO:0051346~negative regulation of hydrolase activity	9	7.56303	0.00342945	WFDC12, TNF, CPEB2, RGS2, PCID2, SERPINB7, SIRT1, WFDC5, DNAJA3
GOTERM_BP_FAT	GO:0002697~regulation of immune effector process	8	6.72269	0.00405393	PVR, PACS1, KLK7, TNF, DEFB103A, KLK5, DUSP10, EIF2AK4
GOTERM_BP_FAT	GO:0050790~regulation of catalytic activity	26	21.8487	0.0041909	ARHGEF4, CDC6, BMP2, PPP2R3A, TNF, CCPG1, CPEB2, PCID2, EDN1, SOCS1, DUSP10, PPP1R10, PMAIP1, SIRT1, STK4, STARD13, WFDC12, UHRF1, RGS2, CCL20, RIPK1, SERPINB7, FAM162A, WFDC5, DNAJA3, BCAR3
GOTERM_BP_FAT	GO:0002920~regulation of humoral immune response	4	3.36134	0.00430393	KLK7, TNF, DEFB103A, KLK5
GOTERM_BP_FAT	GO:2001235~positive regulation of apoptotic signaling pathway	6	5.04202	0.00485575	RIPK1, FAM162A, PMAIP1, STK4, SIRT1, TRIM39
GOTERM_BP_FAT	GO:0051247~positive regulation of protein metabolic process	19	15.9664	0.00491296	CDC6, BMP2, TNF, PPP2R3A, EDN1, SOCS1, PMAIP1, ANKRD6, STK4, SIRT1, UHRF1, CCL20, RIPK1, P2RY1, FAM162A, DNAJA3, EIF2AK4, GNL3, BCAR3
GOTERM_BP_FAT	GO:0051248~negative regulation of protein metabolic process	15	12.605	0.00514252	TNF, CPEB2, PCID2, EDN1, SOCS1, DUSP10, IGF2BP2, SIRT1, WFDC12, RGS2, SERPINB7, WFDC5, EIF2AK4, TRIM39, DNAJA3
GOTERM_BP_FAT	GO:0045598~regulation of fat cell differentiation	5	4.20168	0.00514765	BMP2, TNF, DUSP10, STK4, SIRT1
GOTERM_BP_FAT	GO:0032270~positive regulation of cellular protein metabolic process	18	15.1261	0.0061171	CDC6, BMP2, TNF, EDN1, SOCS1, PMAIP1, ANKRD6, STK4, SIRT1, UHRF1, CCL20, RIPK1, P2RY1, FAM162A, DNAJA3, EIF2AK4, BCAR3, GNL3
GOTERM_BP_FAT	GO:0002684~positive regulation of immune system process	14	11.7647	0.00621886	PVR, KLK7, TNF, CCL20, PCID2, DEFB103A, RIPK1, KLK5, EFNB2, CXCL2, SIRT1, POLR3B, DNAJA3, EIF2AK4
GOTERM_BP_FAT	GO:0065009~regulation of molecular function	29	24.3697	0.00734677	TNF, PPP2R3A, CPEB2, EDN1, DUSP10, PMAIP1, STARD13, CCL20, P2RY1, FAM162A, DNAJA3, ARHGEF4, CDC6, BMP2, CCPG1, PCID2, SOCS1, PPP1R10, SIRT1, STK4, SHANK3, WFDC12, UHRF1, RGS2, RIPK1, SERPINB7, WFDC5, EIF2AK4, BCAR3
GOTERM_BP_FAT	GO:0043281~regulation of cysteine-type endopeptidase activity involved in apoptotic process	6	5.04202	0.00805813	TNF, RIPK1, FAM162A, PMAIP1, SIRT1, DNAJA3
GOTERM_BP_FAT	GO:0032872~regulation of stress-activated MAPK cascade	6	5.04202	0.00805813	BMP2, TNF, RIPK1, EDN1, DUSP10, ANKRD6
GOTERM_BP_FAT	GO:0002819~regulation of adaptive immune response	5	4.20168	0.00820413	PVR, TNF, DUSP10, SIRT1, EIF2AK4
GOTERM_BP_FAT	GO:0070302~regulation of stress-activated protein kinase signaling cascade	6	5.04202	0.008224	BMP2, TNF, RIPK1, EDN1, DUSP10, ANKRD6
GOTERM_BP_FAT	GO:0043900~regulation of multi-organism process	8	6.72269	0.00892234	PACS1, KLK7, TNF, DEFB103A, KLK5, P2RY1, NPR2, EIF2AK4
GOTERM_BP_FAT	GO:0043065~positive regulation of apoptotic process	10	8.40336	0.00898434	ARHGEF4, BMP2, TNF, RIPK1, FAM162A, PMAIP1, STK4, SIRT1, DNAJA3, TRIM39
GOTERM_BP_FAT	GO:0006468~protein phosphorylation	21	17.6471	0.009033	CDC6, BMP2, TNF, SOCS1, EDN1, DUSP10, SMG1, NPR2, CLK1, ANKRD6, STK4, SIRT1, SHANK3, WEE1, CCL20, RGS2, RIPK1, P2RY1, DNAJA3, EIF2AK4, BCAR3
GOTERM_BP_FAT	GO:0071456~cellular response to hypoxia	5	4.20168	0.00912018	CPEB2, EDN1, FAM162A, PMAIP1, SIRT1
GOTERM_BP_FAT	GO:0071900~regulation of protein serine/threonine kinase activity	9	7.56303	0.00937438	CDC6, BMP2, TNF, RGS2, RIPK1, EDN1, DUSP10, STK4, SIRT1
GOTERM_BP_FAT	GO:0043068~positive regulation of programmed cell death	10	8.40336	0.00947908	ARHGEF4, BMP2, TNF, RIPK1, FAM162A, PMAIP1, STK4, SIRT1, DNAJA3, TRIM39
GOTERM_BP_FAT	GO:0009628~response to abiotic stimulus	14	11.7647	0.010827	KCNC2, BMP2, TNF, SORD, CPEB2, EDN1, ASNS, PMAIP1, SIRT1, SHANK3, P2RY1, FAM162A, EIF2AK4, DNAJA3
GOTERM_BP_FAT	GO:0071902~positive regulation of protein serine/threonine kinase activity	7	5.88235	0.0108329	CDC6, BMP2, TNF, RIPK1, EDN1, STK4, SIRT1
GOTERM_BP_FAT	GO:0036294~cellular response to decreased oxygen levels	5	4.20168	0.0108792	CPEB2, EDN1, FAM162A, PMAIP1, SIRT1
GOTERM_BP_FAT	GO:0032874~positive regulation of stress-activated MAPK cascade	5	4.20168	0.0108792	BMP2, TNF, RIPK1, EDN1, ANKRD6
GOTERM_BP_FAT	GO:0051345~positive regulation of hydrolase activity	13	10.9244	0.011012	ARHGEF4, BMP2, UHRF1, TNF, RGS2, CCL20, RIPK1, FAM162A, PMAIP1, SIRT1, DNAJA3, BCAR3, STARD13
GOTERM_BP_FAT	GO:0070304~positive regulation of stress-activated protein kinase signaling cascade	5	4.20168	0.0111471	BMP2, TNF, RIPK1, EDN1, ANKRD6
GOTERM_BP_FAT	GO:2000725~regulation of cardiac muscle cell differentiation	3	2.52101	0.0111816	BMP2, EDN1, EFNB2
GOTERM_BP_FAT	GO:0001959~regulation of cytokine-mediated signaling pathway	5	4.20168	0.0119762	TNF, RIPK1, EDN1, SOCS1, DNAJA3
GOTERM_BP_FAT	GO:0030162~regulation of proteolysis	11	9.2437	0.0122267	WFDC12, TNF, PCID2, RIPK1, SERPINB7, FAM162A, PMAIP1, SIRT1, WFDC5, DNAJA3, TRIM39
GOTERM_BP_FAT	GO:0060562~epithelial tube morphogenesis	7	5.88235	0.0123953	BMP2, TNF, EDN1, EFNB2, STK4, SHANK3, STARD13
GOTERM_BP_FAT	GO:0009615~response to virus	7	5.88235	0.012763	PACS1, APOBEC3B, ODC1, TNF, PMAIP1, POLR3B, EIF2AK4
GOTERM_BP_FAT	GO:0010942~positive regulation of cell death	10	8.40336	0.0128948	ARHGEF4, BMP2, TNF, RIPK1, FAM162A, PMAIP1, STK4, SIRT1, DNAJA3, TRIM39
